# Supplementary material
Source: HighWire-hosted journal article supplement (http://www.cmaj.ca/highwire/filestream/73705/field_highwire_adjunct_files/1/190124-res-10-at.pdf)
Supplement: 190124-res-10-at.pdf [file 190124-res-10-at.pdf]

**Appendix 10 (as submitted by the authors): Supplementary Table 9**  
**Sensitivity analysis of fat mass index in relation to MACE by excluding patients with**  
**age >75 years**

| Fat mass index quartile | Hazard ratio(95%CI) |                  |                  |                   |
|-------------------------|---------------------|------------------|------------------|-------------------|
|                         | Model 1             | Model 2          | Model 3          | Model 4           |
| 1                       | reference           | reference        | reference        | reference         |
| 2                       | 1.04(0.908–1.20)    | 1.02(0.886–1.17) | 1.01(0.874–1.21) | 1.07(0.914– 1.24) |
| 3                       | 1.07 (0.937–1.24)   | 1.06(0.921–1.22) | 1.04(0.906–1.20) | 1.16(0.972–1.39)  |
| 4                       | 1.27(1.11–1.45)     | 1.27(1.11–1.46)  | 1.24(1.08–1.42)  | 1.48(1.18–1.87)   |
| P value for trend       | 0.003               | 0.001            | 0.005            | 0.000             |

Model 1: unadjusted; Model 2: adjusted age, race, sex; Model 3: adjusted for age, race, sex, treatment group, hypertension, hyperlipidemia, smoking, previous cardiovascular disease, previous heart failure, height, fasting blood glucose; model 4: model 3 in addition to lean body mass index
